# Supplementary material for: Available, Bed-sided, Comprehensive (ABC) score to a diagnosis of Methicillin-resistant Staphylococcus aureus infection: a derivation and validation study
Source: Springer Nature journal article supplement (doi:10.1186/s12879-017-2919-2), 2018-01-08
Supplement: MOESM1 [file 15349890]

## Additional file 1. The provisional ABC score.

|                                                                     | Points |    |
|---------------------------------------------------------------------|--------|----|
|                                                                     | Yes    | No |
| 1. MRSA isolated from blood or other aseptic samples*               | 3      | 0  |
| 2. MRSA $\geq 2+$ by Gram-staining or $\geq 10^5$ cfu/mL in culture | 2      | 0  |
| 3. Neutrophil aggregation or phagocytosis shown by Gram-staining    | 2      | 0  |
| 4. Local inflammation                                               | 1      | 0  |
| 5. Systemic inflammatory response**                                 | 1      | 0  |
| 6. Elevated inflammatory markers***                                 | 1      | 0  |
| Diagnostic criteria (total points possible: 10)                     |        |    |
| $\leq 3$ points: Colonization                                       |        |    |
| $\geq 4$ points: Active infection                                   |        |    |

\*Ascites, pleural fluid, pancreatic fluid, spinal fluid, abscess, or wound.

\*\*Fever, chills, rigors, hypotension or decreased urine output.

\*\*\*White blood cells or C-reactive protein.
