# Supplementary material for: Available, Bed-sided, Comprehensive (ABC) score to a diagnosis of Methicillin-resistant Staphylococcus aureus infection: a derivation and validation study
Source: Springer Nature journal article supplement (doi:10.1186/s12879-017-2919-2), 2018-01-08
Supplement: MOESM3 [file 15349890]

**Additional file 3. Clinical diagnosis associated with each specimen in the derivation cohort.****(A) Clinical specimens assigned 0 points in the provisional version**

| Clinical diagnosis<br>N (%) | Total<br>115      | Nasal<br>29 (25.2%) | Pharyngeal<br>18 (15.7%) | Expectorated<br>sputum<br>15 (13.0%) | Aspirated<br>sputum<br>36 (31.3%) | Others<br>17 (14.8%) |
|-----------------------------|-------------------|---------------------|--------------------------|--------------------------------------|-----------------------------------|----------------------|
| Colonization                | 76.5%<br>(88/115) | 96.6%<br>(28/29)    | 100%<br>(18/18)          | 66.7%<br>(10/15)                     | 47.2%<br>(17/36)                  | 82.4%<br>(14/17)     |
| Undetermined                | 8.7%<br>(10/115)  | 3.4%<br>(1/29)      | 0%<br>(0/18)             | 13.3%<br>(2/15)                      | 16.7%<br>(6/36)                   | 11.8%<br>(2/17)      |
| Active Infection            | 14.8%<br>(17/115) | 0%<br>(0/29)        | 0%<br>(0/18)             | 20.0%<br>(3/15)                      | 36.1%<br>(13/36)                  | 5.9%<br>(1/17)       |

**(B) Clinical specimens assigned 3 points in the provisional version**

| Clinical diagnosis<br>N (%) | Total<br>57      | Blood<br>14 (24.6%) | Drained pus<br>7 (12.3%) | Surgical site<br>14 (24.6%) | Pus<br>12 (21.1%) | Others<br>10 (17.5%) |
|-----------------------------|------------------|---------------------|--------------------------|-----------------------------|-------------------|----------------------|
| Colonization                | 19.3%<br>(11/57) | 14.3%<br>(2/14)     | 0%<br>(0/7)              | 35.7%<br>(5/14)             | 33.3%<br>(4/12)   | 0%<br>(0/10)         |
| Undetermined                | 26.3%<br>(15/57) | 0%<br>(0/14)        | 42.9%<br>(3/7)           | 50.0%<br>(7/14)             | 33.3%<br>(4/12)   | 10.0%<br>(1/10)      |
| Active Infection            | 54.4%<br>(31/57) | 85.7%<br>(12/14)    | 57.1%<br>(4/7)           | 14.3%<br>(2/14)             | 33.3%<br>(4/12)   | 90.0%<br>(9/10)      |

Others include pleural effusion, synovial fluid, periosteum, cornea, skin, and aural and vaginal discharge samples.
