# Supplementary material for: Available, Bed-sided, Comprehensive (ABC) score to a diagnosis of Methicillin-resistant Staphylococcus aureus infection: a derivation and validation study
Source: Springer Nature journal article supplement (doi:10.1186/s12879-017-2919-2), 2018-01-08
Supplement: MOESM5 [file 15349890]

**Additional file 5. Receiver operating characteristic curves for the provisional score of the derivation phase.**

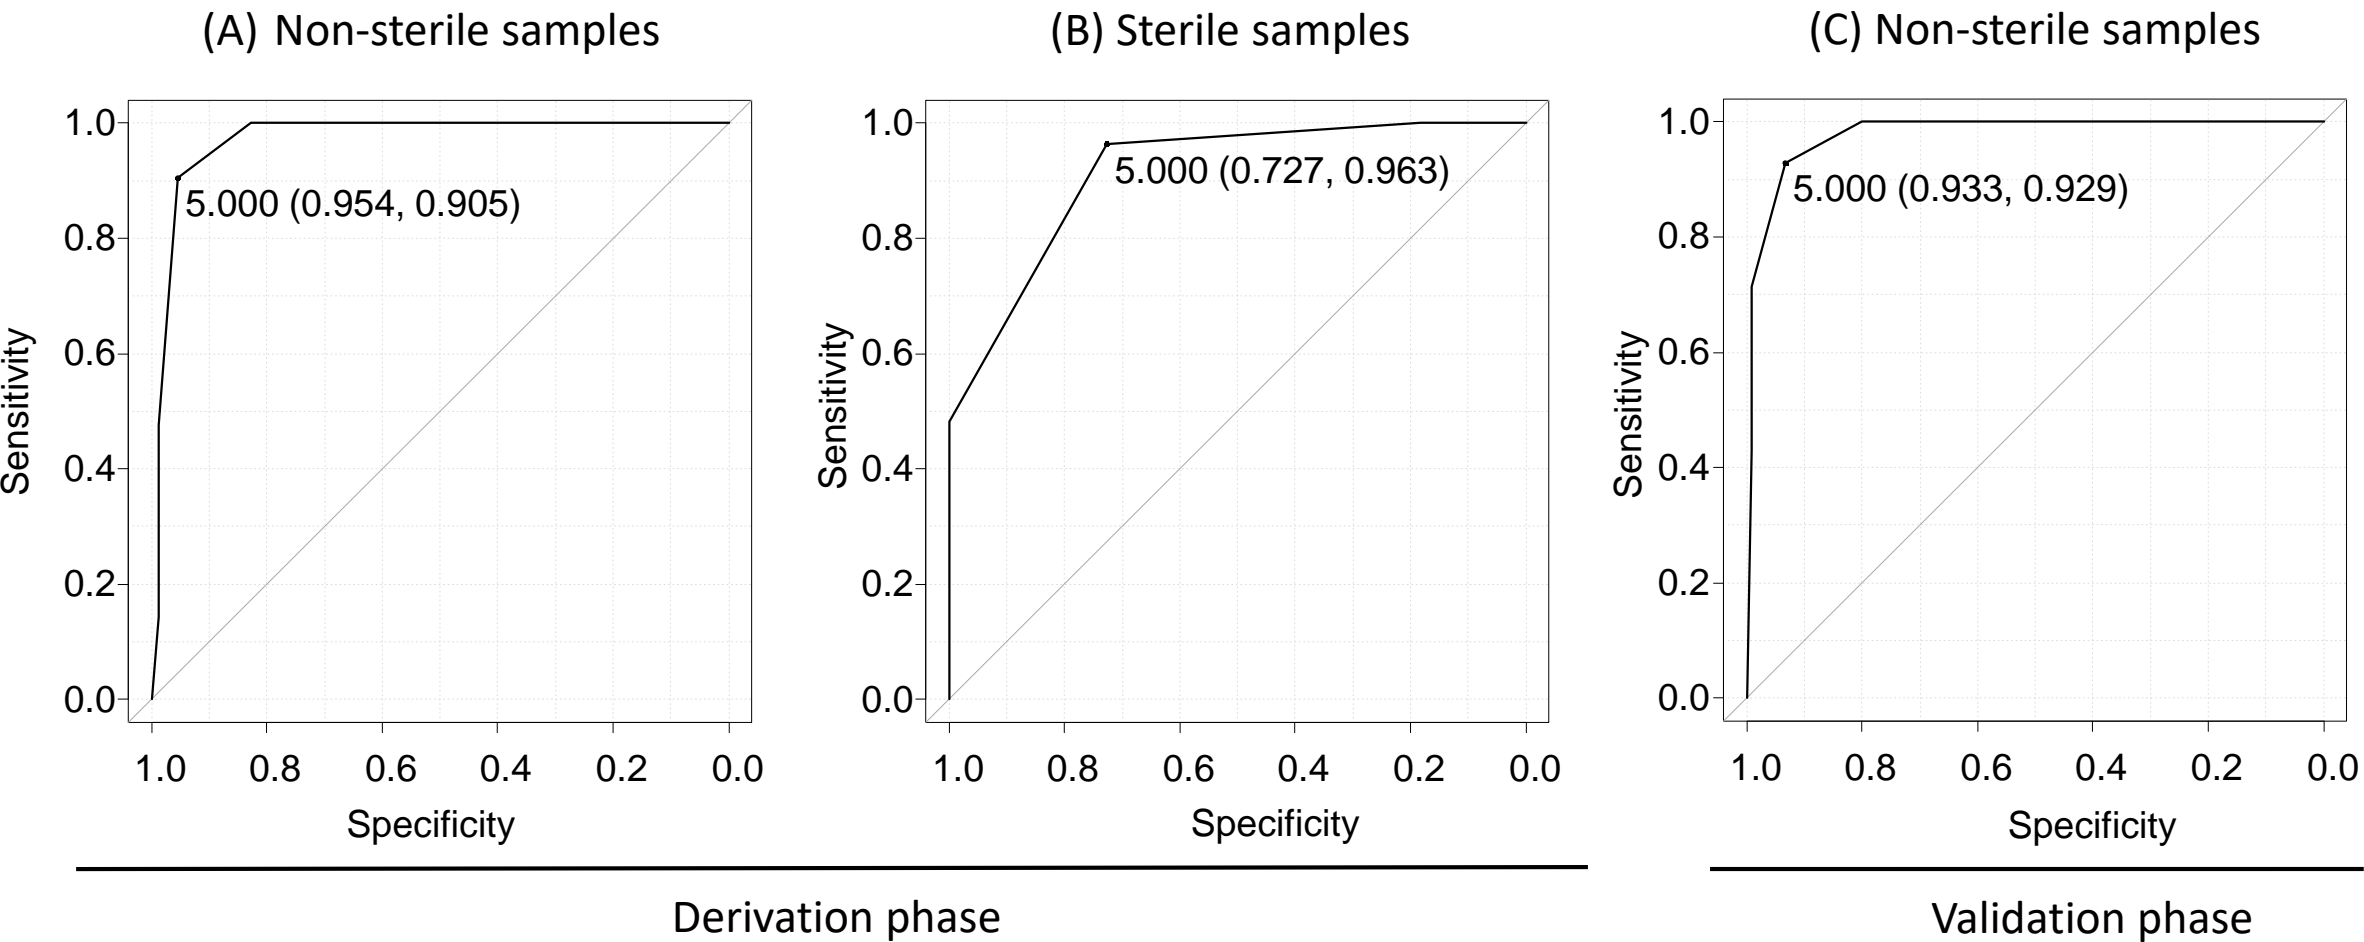

(A) sensitivity, 100%; specificity, 95.7%; PPV, 0.826; NPV, 1.0; AUC, 0.973 (95% CI: 0.946–1.0)  
(B) sensitivity, 96.3%; specificity, 72.7%; PPV, 0.897; NPV, 0.889; AUC, 0.914 (95% CI: 0.829–0.999)  
(C) sensitivity, 92.9%; specificity, 93.3%; PPV, 0.619; NPV, 0.991; AUC, 0.978 (95% CI: 0.955–1.0)  
For the sterile samples in the validation phase, subgroup analysis was inapplicable due to the small number of the cases (n = 6).  
AUC, area under the curve; PPN, positive predictive values; NPV negative predictive values; NA, not applicable.
